# Supplementary material for: Nanoporous palladium catalyzed silicon-based one-pot cross-coupling reaction of aryl iodides with organosilanes
Source: Royal Society of Chemistry journal article supplement (doi:10.1039/c4cy00256c), 2014-01-01
Supplement: c4cy00256c1.pdf [file c4cy00256c1.pdf]

## Supporting Information

### **Nanoporous Palladium Catalyzed Silicon-Based One-Pot Cross-Coupling Reaction of Aryl Iodides with Organosilanes**

Zhiwen Li,<sup>†</sup> Sha Lin,<sup>†</sup> Lisha Ji,<sup>†</sup> Zhonghua Zhang,<sup>‡</sup> Xiaomei Zhang,<sup>\*,†</sup> and Yi  
Ding<sup>\*,†,‡</sup>

<sup>†</sup> Center for Advanced Energy Materials & Technology Research (AEMT), and  
School of Chemistry and Chemical Engineering, Shandong University, Jinan 250100,  
(China). E-mail: [yding@sdu.edu.cn](mailto:yding@sdu.edu.cn); [zhangxiaomei@sdu.edu.cn](mailto:zhangxiaomei@sdu.edu.cn)

<sup>‡</sup> Key Laboratory for Liquid-Solid Structural Evolution and Processing of Materials,  
Ministry of Education, Shandong University, Jinan 250061, (China).

### **Preparation of Catalyst.**

Al<sub>77</sub>Pd<sub>23</sub> (at.%) alloy was prepared by melting pure Al (99.9 wt.%) and pure Pd (99.95 wt.%) in a quartz crucible using a high frequency induction furnace in argon atmosphere. Using a single roller melt-spinning apparatus, the alloy ingots were remelted in a quartz tube by high-frequency induction heating and then rapidly solidified onto a copper roller at a circumferential speed of 18 m s<sup>-1</sup>. The ribbons obtained were normally 20-50 μm in thickness, 2-5 mm in width and several centimeters in length. Sodium hydroxide solution (10 wt %) was used to etch the magnesium in the Al-Pd alloy at room temperature for 6 h.

### **Experimental Section.**

The preparation of 4-methyl-bipheny **4a** was given as a representative example. Nanoporous palladium (30 mg), THF (1.5 mL), MeOH (0.2 mL), and phenylsilane **1f** (1 mmol) were added in a micro reaction vial at room temperature. The mixture was stirred until no bubbles emerged. 1.5 mmol 4-iodotoluene and 3 mmol TBAF in 3 mL THF was added into the system without changing reaction vessel and then the reaction temperature was elevated to 80 °C. After reacting at this temperature for 6 h, the reaction mixture was concentrated by rotary evaporation and the residue was purified by column chromatography on silica gel using ethyl acetate/petroleum ether (60~90 °C) (1:1) as eluent to give **4a**. The recovered catalyst was washed with THF and water and reused without further purification.

Scanning electron microscope (SEM) observation was carried out using a JEOL JSM-6700F instrument operated at an accelerating voltage of 3.0 kV.

**NMR signals:**

**Dimethylphenylsilanol (2a):**  $^1\text{H}$  NMR (300 MHz,  $\text{CDCl}_3$ )  $\delta$  7.64-7.60 (m, 2H), 7.46-7.37 (m, 3H), 3.15 (bs, 1H), 0.41 (s, 6H).

**Dimethylphenylmethoxysilane (2aa):**  $^1\text{H}$  NMR (300 MHz,  $\text{CDCl}_3$ )  $\delta$  7.61-7.54 (m, 2H), 7.42-7.34 (m, 3H), 3.43 (s, 3H), 0.39 (s, 3H), 0.38 (s, 3H).

**Dimethylphenylethoxysilane (2aaa):**  $^1\text{H}$  NMR (300 MHz,  $\text{CDCl}_3$ )  $\delta$  7.65-7.53 (m, 2H), 7.42-7.31 (m, 3H), 3.70-3.63 (t,  $J = 7.2$  Hz, 2H), 1.21-1.15 (q,  $J = 6.9$  Hz, 3H), 0.39 (s, 3H), 0.38 (s, 3H).

**Diphenylsilanediols (2b):**  $^1\text{H}$  NMR (300 MHz,  $\text{CDCl}_3$ )  $\delta$  7.73-7.70 (m, 4H), 7.49-7.33 (m, 6H), 2.17 (bs, 2H).

**Triphenylsilanols (2c):**  $^1\text{H}$  NMR (300 MHz,  $\text{CDCl}_3$ )  $\delta$  7.62-7.59 (m, 6H), 7.44-7.32 (m, 9H), 2.75-2.73 (bs, 1H).

**Triethylsilanol (2d):**  $^1\text{H}$  NMR (300 MHz,  $\text{CDCl}_3$ )  $\delta$  1.65 (bs, 1H), 1.00-0.95 (t,  $J = 7.8$  Hz, 9H), 0.59 (q,  $J = 7.8$  Hz, 6H).

**Tributylsilanol (2e):**  $^1\text{H}$  NMR (300 MHz,  $\text{CDCl}_3$ )  $\delta$  1.94 (bs, 1H), 1.37-1.30 (m, 12H), 0.92-0.87 (t,  $J = 6.7$  Hz, 9H), 0.62-0.57 (t,  $J = 8.0$  Hz, 6H).

**Phenyltrimethoxysilane (2f):**  $^1\text{H}$  NMR (400 MHz,  $\text{CDCl}_3$ )  $\delta$  7.71-7.69 (m, 2H), 7.46-7.40 (m, 3H), 3.65 (s, 9H).

**Phenyltriethoxysilane (2ff):**  $^1\text{H}$  NMR (400 MHz,  $\text{CDCl}_3$ )  $\delta$  7.70-7.66 (m, 2H), 7.40-

7.30 (m, 3H), 3.90-3.83 (q,  $J = 6.9$  Hz, 6H), 1.25-1.20 (t,  $J = 7.2$  Hz, 9H).

**4-methyl-bipheny (4a):**  $^1\text{H}$  NMR (300 MHz,  $\text{CDCl}_3$ )  $\delta$ 7.53-7.49 (m, 2H), 7.44-7.41 (m, 2H), 7.40-7.32 (m, 2H), 7.28-7.22 (m, 1H), 7.19-7.15 (m, 2H), 2.33-2.32 (d, 3H).

**4-methoxy-biphenyl (4b):**  $^1\text{H}$  NMR (300 MHz,  $\text{CDCl}_3$ )  $\delta$ 7.57-7.51 (m, 4H), 7.44-7.39 (m, 2H), 7.33-7.28 (m, 1H), 7.01-6.56 (m, 2H), 3.86 (s, 3H).

**4-fluoro-bipheny (4c):**  $^1\text{H}$  NMR (300 MHz,  $\text{CDCl}_3$ )  $\delta$ 7.51-7.41 (m, 4H), 7.40-7.34 (m, 2H), 7.30-7.25 (m, 1H), 7.09-7.02 (m, 2H).

**4-acetyl-biphenyl (4d):**  $^1\text{H}$  NMR (300 MHz,  $\text{CDCl}_3$ )  $\delta$ 8.06-8.02 (m, 2H), 7.71-7.67 (m, 2H), 7.65-7.61 (m, 2H), 7.51-7.38 (m, 3H), 2.64 (s, 3H).

**4-nitro-biphenyl (4e):**  $^1\text{H}$  NMR (300 MHz,  $\text{CDCl}_3$ )  $\delta$ 8.33-8.28 (m, 2H), 7.77-7.72 (m, 2H), 7.65-7.61 (m, 2H), 7.53-7.42 (m, 3H).

**4-hydroxy-bipheny (4f):**  $^1\text{H}$  NMR (300 MHz,  $\text{CDCl}_3$ )  $\delta$ 7.57-7.53 (m, 2H), 7.51-7.47 (m, 2H), 7.45-7.39 (m, 2H), 7.34-7.28 (m, 1H), 6.94-6.89 (m, 2H).
